# Supplementary material
Source: Springer Nature journal article supplement (https://www.springermedizin.de/resource/supplementary/12891_2011_1426_MOESM1_ESM.pdf/9508288)

**TKR****THR****Relative risk and 95% CI**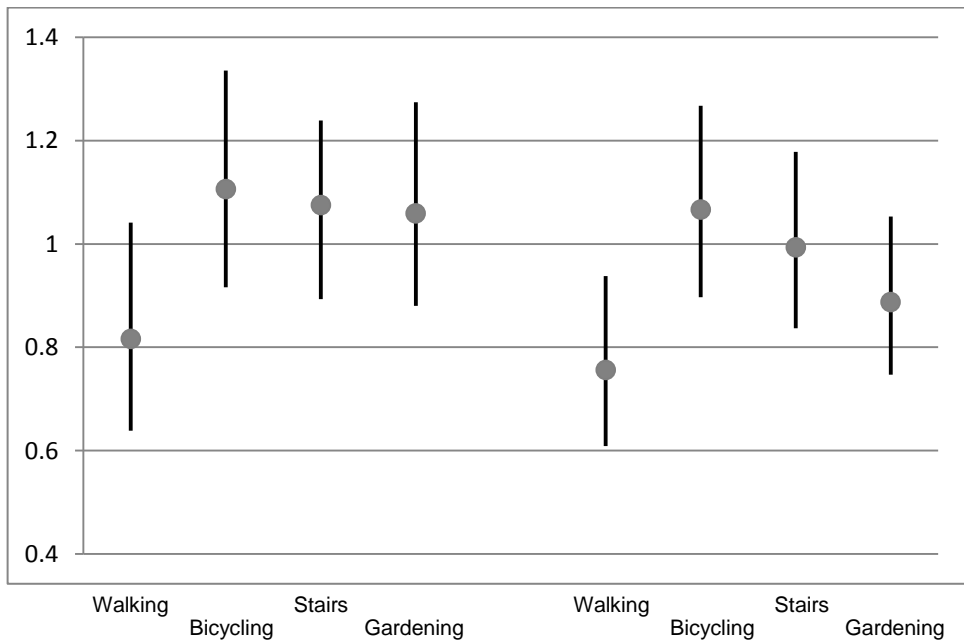

Supplement: MOESM1 [file 9508288]
